# Supplementary material for: Bestatin, A Pluripotent Immunomodulatory Small Molecule, Drives Robust and Long-Lasting Immune Responses as an Adjuvant in Viral Vaccines
Source: MDPI journal article supplement (doi:10.3390/vaccines11111690), 2023-11-04

## **Supplementary Table legends**

### **Table S1. List of primer sequences for qRT-PCR.**

## **Supplementary Figure legends**

### **Figure S1. Cytotoxicity of bestatin measured by cell viability assay in BHK-21, LF-BK, ZZ-R, murine PECs and porcine PBMCs.**

(a–e) Cell viability of BHK-21 (a); LF-BK (b), ZZ-R cells (c); murine PECs (d); and porcine PBMCs (e).

Data have been represented as the mean  $\pm$  SEM of triplicate measurements ( $n = 3$ /group).

Statistical analyses were performed using one-way ANOVA with Dunnett's *post hoc* test.

### **Figure S2. Bestatin alone-mediated host defense in early stage of FMDV infection on mice.**

C57BL/6 mice (6–7 weeks-old,  $n = 5$ /group) were administered intramuscularly a bestatin alone. Mice were challenged with FMDV O (100 LD<sub>50</sub> O/VET/2013) or FMDV A (100 LD<sub>50</sub> A/Malay/97) at 3 or 7 days post-injection (dpi) using an intraperitoneal injection. Survival rates and body weights were monitored for 7 days post-challenge (dpc) with the respective viruses. (a–i) experimental workflow (a); survival rates in 3 dpi challenged group with O/VET/2013 (b) or A/Malay/97 (c); changes in body weight 3 dpi challenged group with O/VET/2013 (d) or A/Malay/97 (e); survival rates in 7 dpi challenged group with O/VET/2013 (f) or A/Malay/97 (g); and changes in body weight 7 dpi challenged group with O/VET/2013 (h) or A/Malay/97 (i). Data are presented as mean  $\pm$  SEM of triplicate measurements ( $n = 5$ /group).

**Table S1**

| Target       | Forward/Reverse | Sequence (5-3)        | Length(mer) |
|--------------|-----------------|-----------------------|-------------|
| IFN $\alpha$ | IFN $\alpha$ F  | CATCTGCTCTCTGGGCTGTG  | 20          |
|              | IFN $\alpha$ R  | TGAGGGGATCCAAAGTCCCT  | 20          |
| IFN $\beta$  | IFN $\beta$ F   | TGCAACCACCACAATTCCAGA | 21          |
|              | IFN $\beta$ R   | GGTTTCATTCCAGCCAGTGC  | 20          |
| IFN $\gamma$ | IFN $\gamma$ F  | GCCATTCAAAGGAGCATGGAT | 21          |
|              | IFN $\gamma$ R  | CTGATGGCTTTGCGCTGGAT  | 20          |
| IL-29        | IL-29 F         | GCTACAGCTTGGATCGTGGT  | 20          |
|              | IL-29 R         | TCAGGTCCCTTACGAGGAGG  | 20          |
| RIG-I        | RIG-I F         | GCACCTCATACTTACAGCCCA | 21          |
|              | RIG-I R         | CCACAACCAGTAGGAGCACAT | 21          |
| CD28         | CD28 F          | TCAAAGGAGTTCCGGGCATC  | 20          |
|              | CD28 R          | CTGAAGCAGGCGGGAGTAAT  | 20          |
| CD19         | CD19 F          | GCAGGTCCTCTTCCAGTCAC  | 20          |
|              | CD19 R          | TCAGGATCAGGGCTCTTCGA  | 20          |
| CD21         | CD21 F          | TGCCATGCCTACAAAGCTGA  | 20          |
|              | CD21 R          | GTAGTAACCAGGGCGGCATT  | 20          |
| CD81         | CD81 F          | CCAGACTACCAGCCTCCTCT  | 20          |
|              | CD81 R          | GCACAGTACCATGCTCAGGA  | 20          |
| C3d          | C3d F           | ACAAATTGACCCAGCGTAGG  | 20          |
|              | C3d R           | GCACGTCCTTGCTGTACTGA  | 20          |
| HPRT         | HPRT F          | CCCAGCGTCGTGATTAGTGA  | 20          |
|              | HPRT R          | GCCGTTCAAGTCCTGTCCATA | 20          |

Figure S1

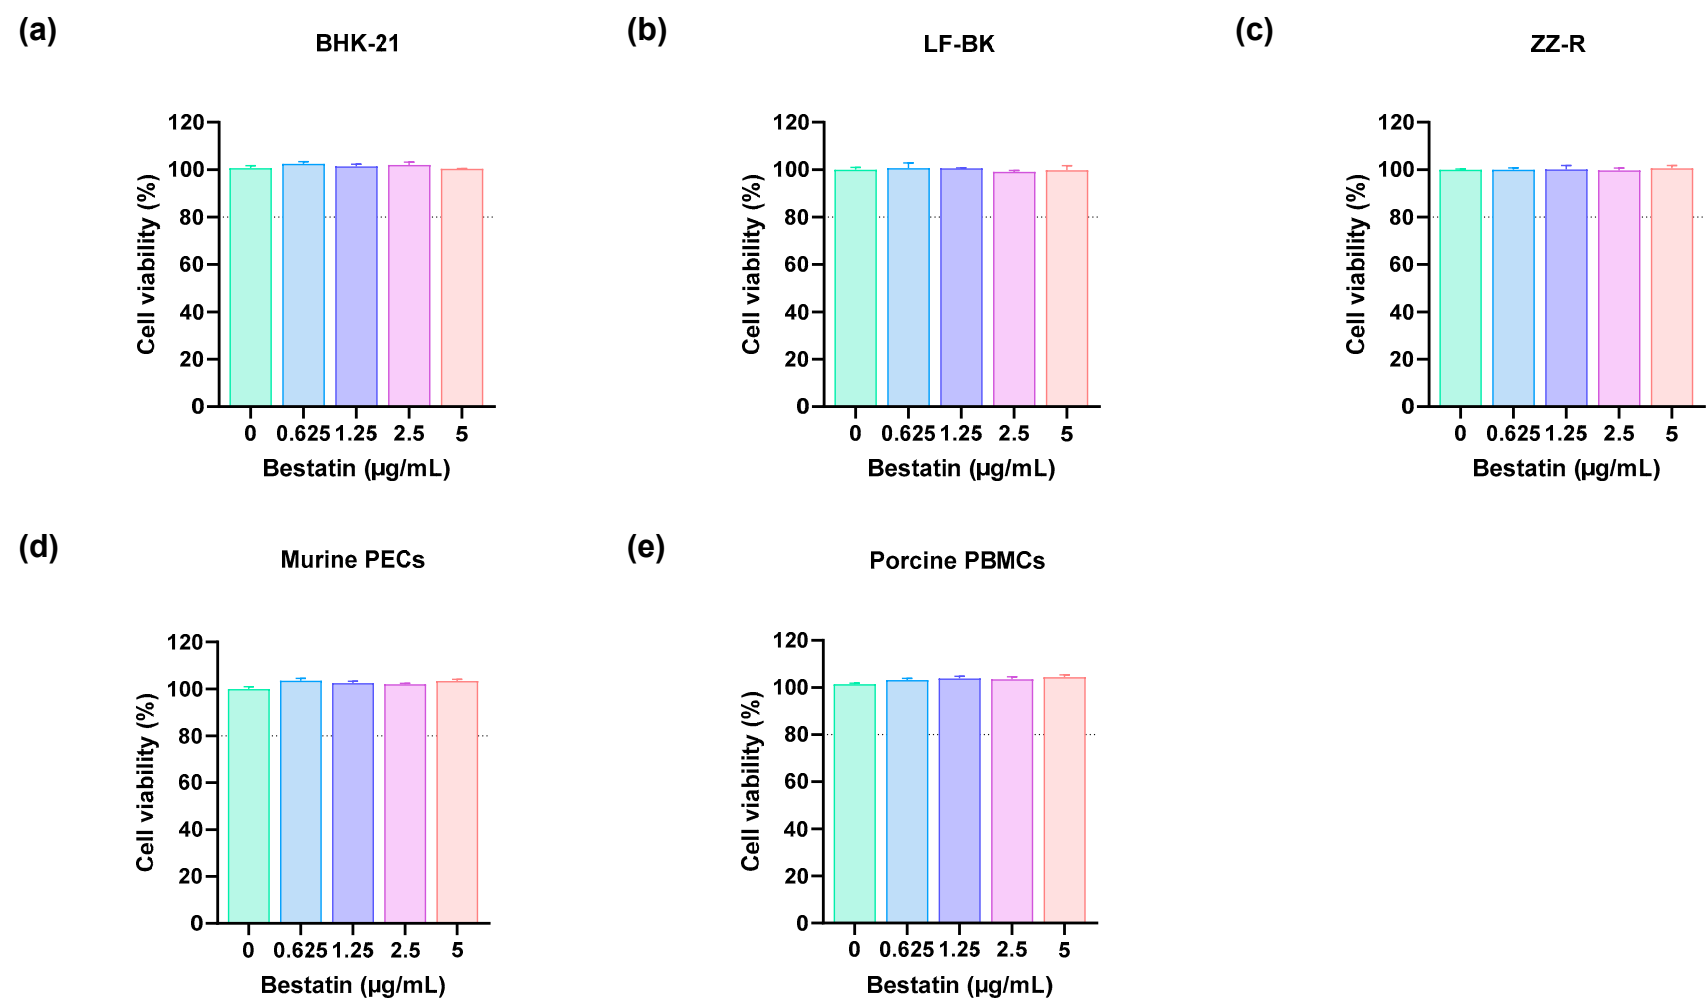

Figure S2

(a)

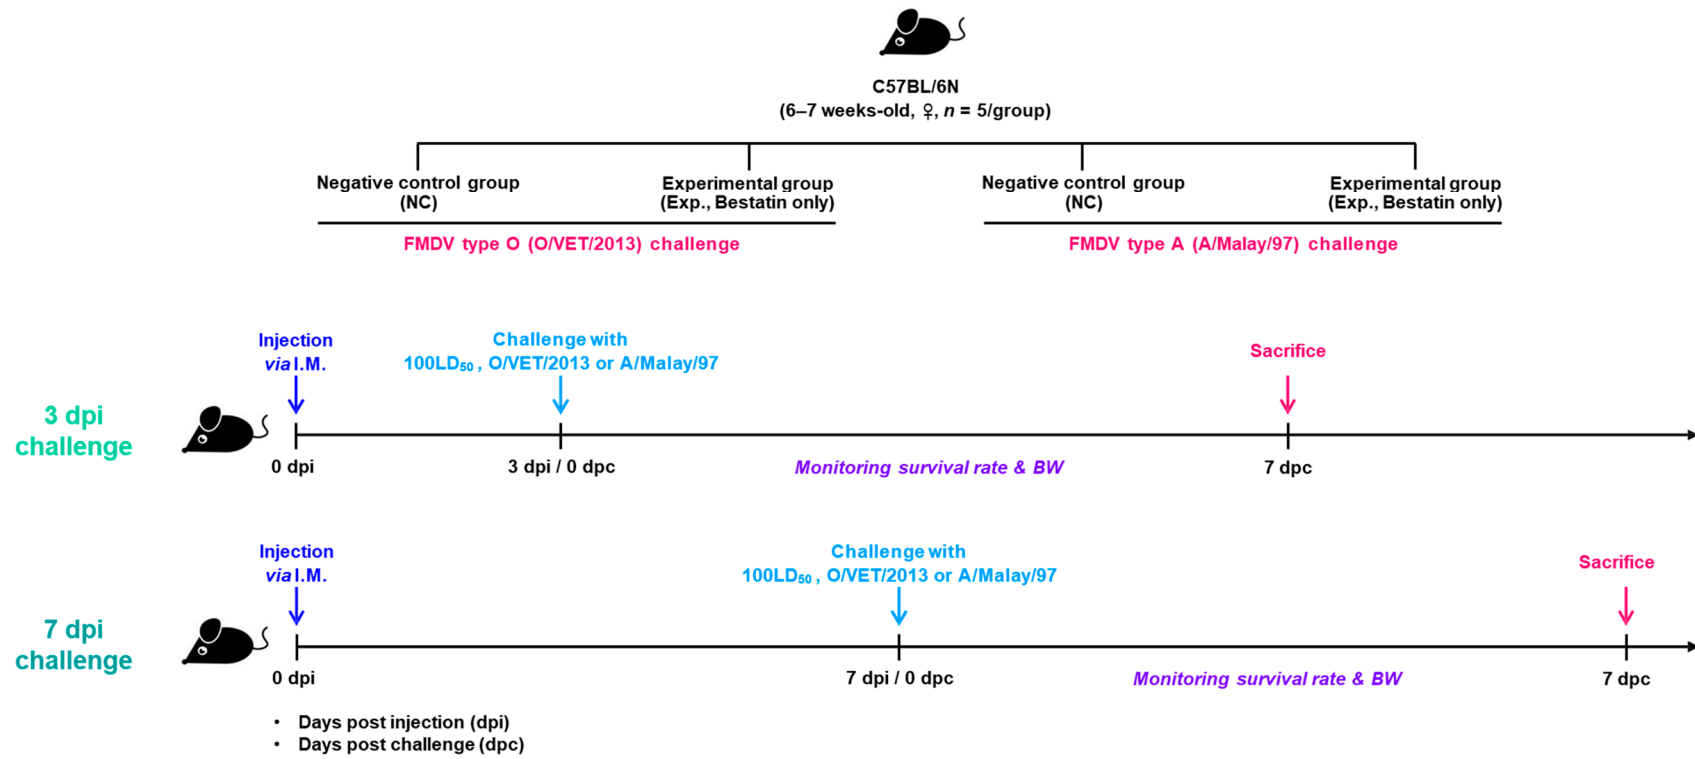

Figure S2 (continued)

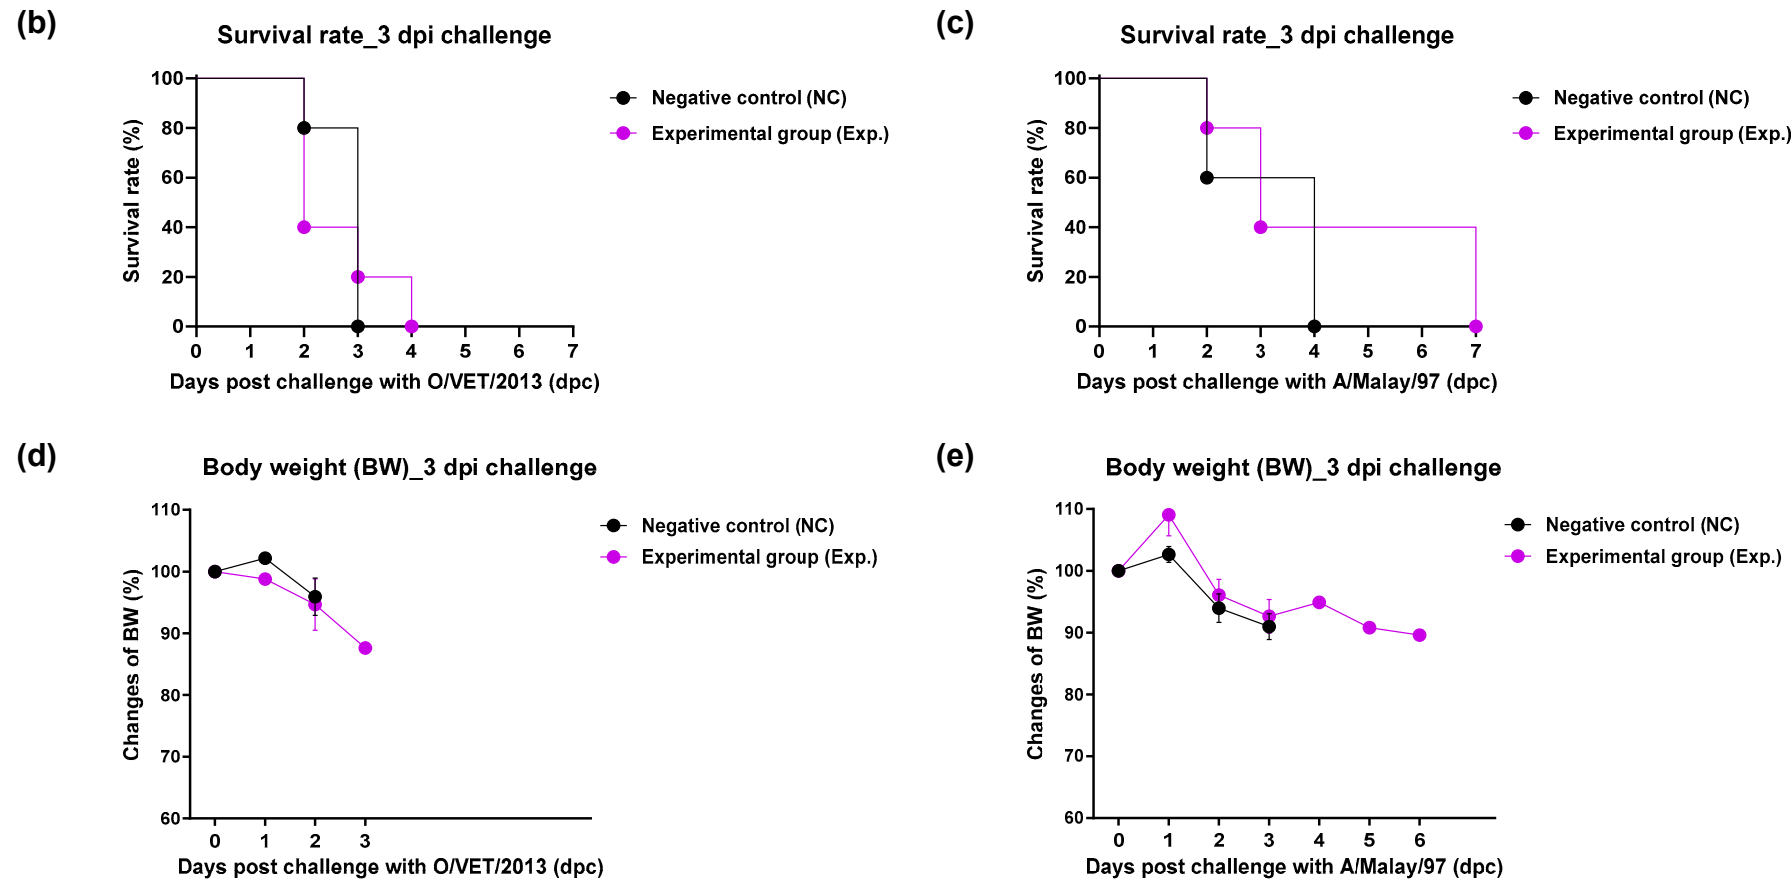

Figure S2 (continued)

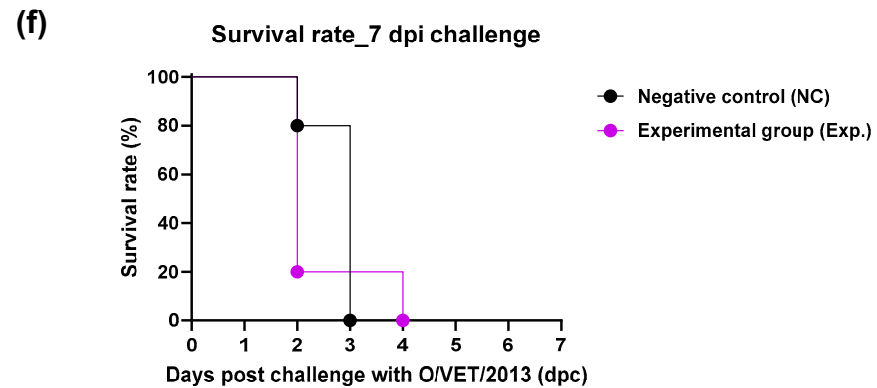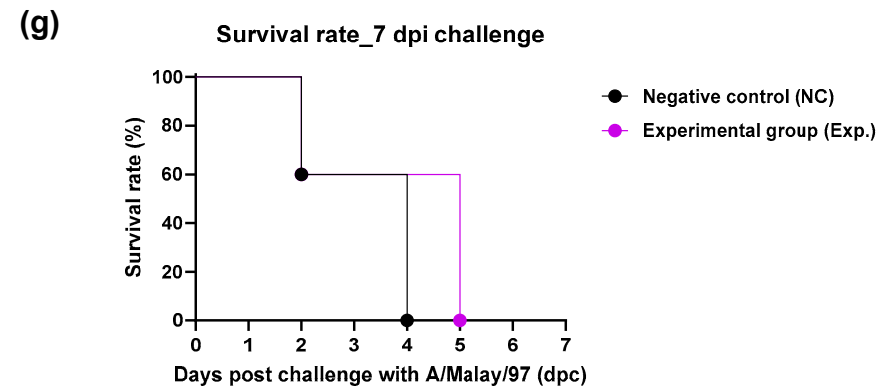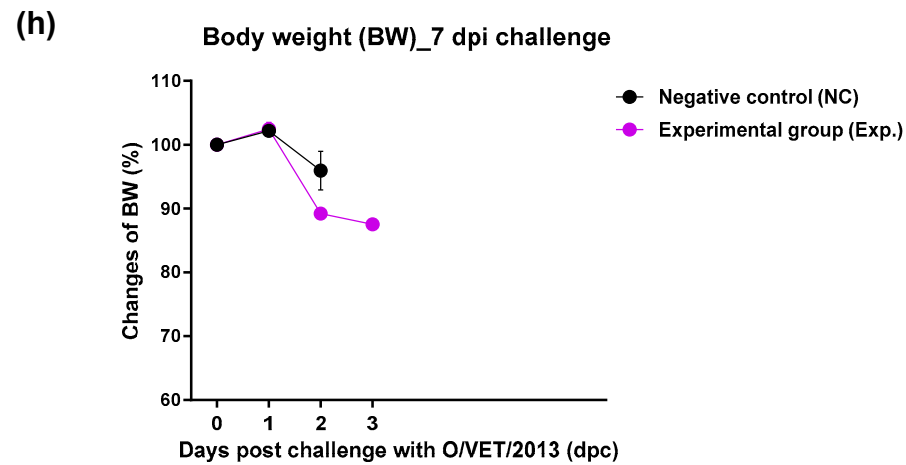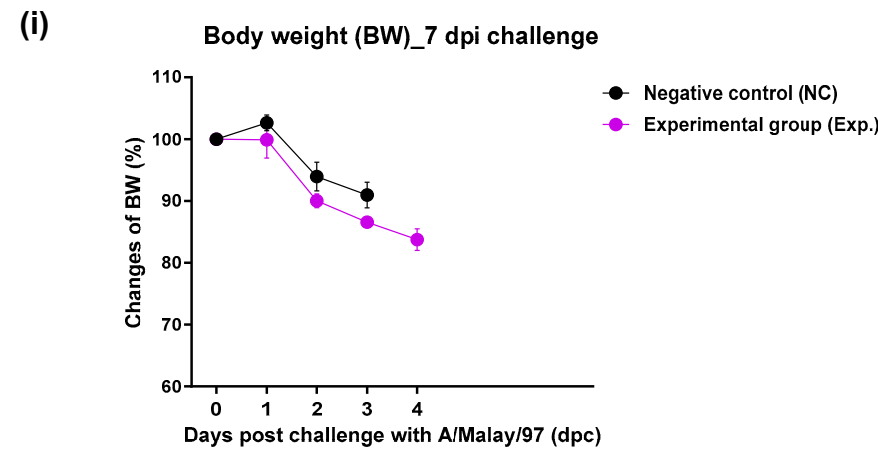

Supplement: s1 [file s1]
